# Supplementary material
Source: Springer Nature journal article supplement (https://www.springermedizin.de/resource/supplementary/12936_2012_2568_MOESM3_ESM.pdf/9543254)
Supplement: MOESM3 [file 9543254]

**Additional Table 3. Poisson Regression for association between malaria and control samples controlling for age**

| Gene           | SNP      | dbSNP ID  | Risk Genotype | P value      |
|----------------|----------|-----------|---------------|--------------|
| <i>IL1B</i>    | -5839C>T | rs1143629 | TC            | <b>0.02</b>  |
|                |          |           | CC            | <b>0.08</b>  |
|                | -31C>T   | rs1143627 | CT            | 0.25         |
|                |          |           | TT            | 0.41         |
|                |          |           | GA            | 0.80         |
| <i>IL2</i>     | -330G>T  | rs2069762 | AA            | 0.75         |
|                |          |           | GT            | 0.26         |
| <i>IL4</i>     | -590C>T  | rs2243250 | TT            | 0.30         |
|                |          |           | CT            | 0.95         |
| <i>IL4R</i>    | 1902A>G  | rs1801275 | TT            | 0.87         |
|                |          |           | AG            | <b>0.009</b> |
| <i>IL6</i>     | -174C>G  | rs1800795 | GG            | 0.31         |
|                |          |           | GC            | <b>0.01</b>  |
| <i>IL8</i>     | -251A>T  | rs4073    | CC            | 0.34         |
|                |          |           | AT            | 0.72         |
| <i>IL10</i>    | -592A>C  | rs1800872 | TT            | 0.59         |
|                |          |           | CA            | 0.42         |
|                | -1082T>C | rs1800896 | CC            | <b>0.15</b>  |
|                |          |           | GA            | 0.32         |
|                |          |           | GG            | 0.61         |
| <i>IL12A</i>   | 121G>A   | rs568408  | CT            | 0.25         |
|                |          |           | TT            | 0.73         |
|                |          |           | AG            | 0.93         |
| <i>IL12B</i>   | 735T>C   | rs7709212 | GG            | 0.98         |
|                |          |           | TC            | 0.30         |
|                | 458A>G   | rs2546890 | TT            | 0.31         |
|                |          |           | AG            | <b>0.01</b>  |
|                |          |           | GG            | <b>0.02</b>  |
| <i>IL12RBI</i> | 159A>C   | rs3212227 | AC            | 0.22         |
|                |          |           | AA            | 0.67         |
|                |          |           | GA            | <b>0.009</b> |
| <i>SP110</i>   | -1094A>G | rs375947  | GG            | <b>0.003</b> |
|                |          |           | GA            | 0.56         |
|                |          |           | AA            | <b>0.07</b>  |
| <i>TNF</i>     | 14622C>T | rs2114592 | CT            | <b>0.13</b>  |
|                |          |           | CC            | <b>0.15</b>  |
|                |          |           | CT            | 0.30         |
| <i>TNF</i>     | -308C>T  | rs1800629 | CC            | 0.32         |
|                |          |           | AG            | 0.84         |
|                |          |           | AA            | 0.80         |
|                | -1031C>T | rs1799964 | CT            | 0.85         |
|                |          |           | TT            | <b>0.13</b>  |
| -238A>G        | rs361525 | AG        | <b>0.001</b>  |              |
|                |          | GG        | <b>0.001</b>  |              |
| <i>TNF</i>     | -863A>C  | rs1800630 | AC            | 0.82         |
|                |          |           | CC            | 0.23         |
| <i>TNF</i>     | -857C>T  | rs1799724 | TC            | 0.76         |

|                 |         |            |    |             |
|-----------------|---------|------------|----|-------------|
|                 |         |            | TT | <b>0.05</b> |
| <i>TNFRSF1A</i> | 303A>G  | rs4149622  | AG | 0.71        |
|                 |         |            | GG | 0.73        |
| <i>IFNG</i>     | 874A>T  | rs2430561  | TA | <b>0.18</b> |
|                 |         |            | TT | <b>0.13</b> |
| <i>IFNGR1</i>   | -611C>T | rs1327474  | GA | 0.85        |
|                 |         |            | AA | 0.60        |
|                 | -56T>C  | rs2234711  | CT | 0.80        |
|                 |         |            | CC | <b>0.02</b> |
| <i>VDR</i>      | FokI    | rs10735810 | CT | 0.92        |
|                 |         |            | CC | 0.34        |
|                 | TaqI    | rs731236   | TC | 0.46        |
|                 |         |            | CC | 0.86        |
|                 | BsmI    | rs1544410  | AG | 0.58        |
|                 |         |            | AA | 0.30        |
| <i>PTPN22</i>   | R630W   | rs2476601  | GA | 0.23        |
| <i>P2X7</i>     | 1513    | rs3751143  | TG | 0.54        |
|                 |         |            | GG | 0.23        |

---

\*Age is included as a covariate in Poisson regression
